# Supplementary material
Source: PubMed Central journal article supplement (PMC3993768)
Supplement: JVI.03515-13_zjv999098890so1.pdf [file JVI.03515-13_zjv999098890so1.pdf]

## Supplemental Figure 1

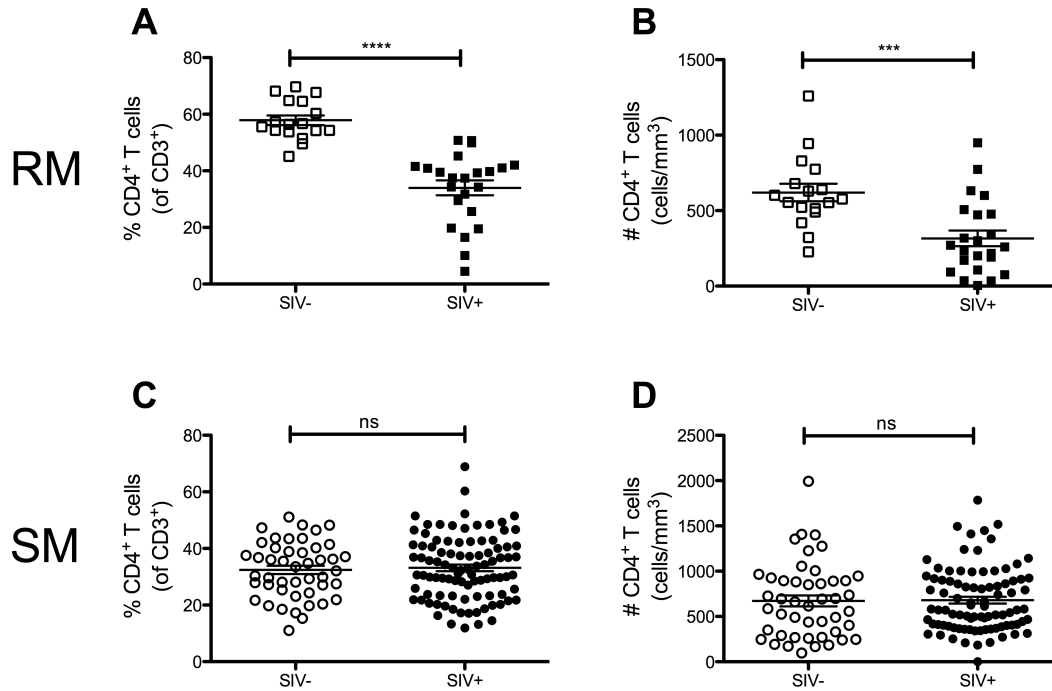

**SUPPLEMENTAL FIGURE 1. CD4<sup>+</sup> T cells are depleted in SIV-infected RMs, but stable in SIV-infected SMs.** The percentages (A) and absolute counts (B) of CD4<sup>+</sup> T cells were compared between 17 uninfected (□) and 23 SIVmac239-infected (■) RMs. Similar analyses were performed between 46 uninfected (o) and 94 naturally SIV-infected (•) SMs in (C) and (D) (\*\*\*,  $P < 0.001$ ; \*\*\*\*,  $P < 0.0001$ ;  $P = ns$ ; as determined by *t* tests).

Supplemental Figure 2

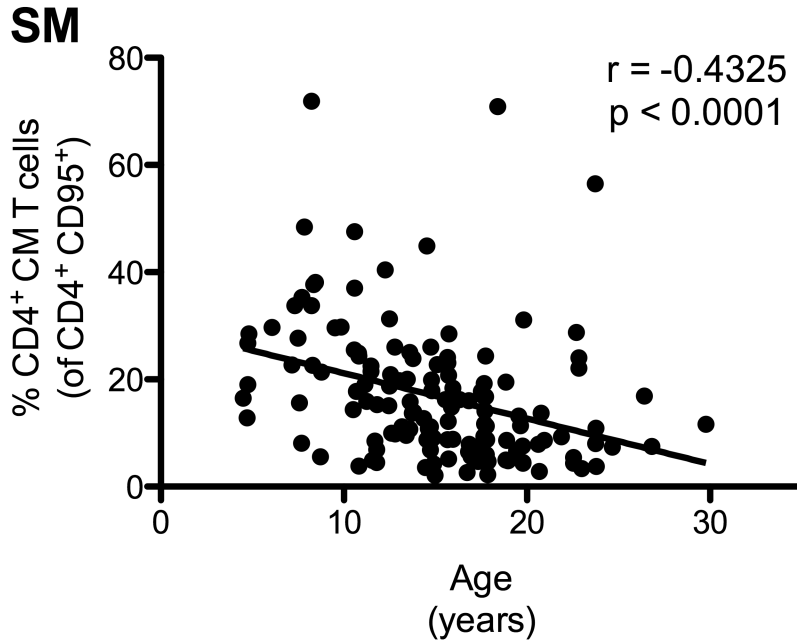

**SUPPLEMENTAL FIGURE 2. The percentage of CD4<sup>+</sup> T<sub>CM</sub> cells in SMs is negatively correlated with the age of the animals.** A scatterplot depicts the significant relationship between the fraction of CD4<sup>+</sup> T<sub>CM</sub> cells (of CD4<sup>+</sup>CD95<sup>+</sup> T cells) and the age of SMs in SIV-infected and uninfected SMs at the time of sampling ( $P < 0.0001$ , as determined by the Spearman rank correlation test).

### Supplemental Figure 3

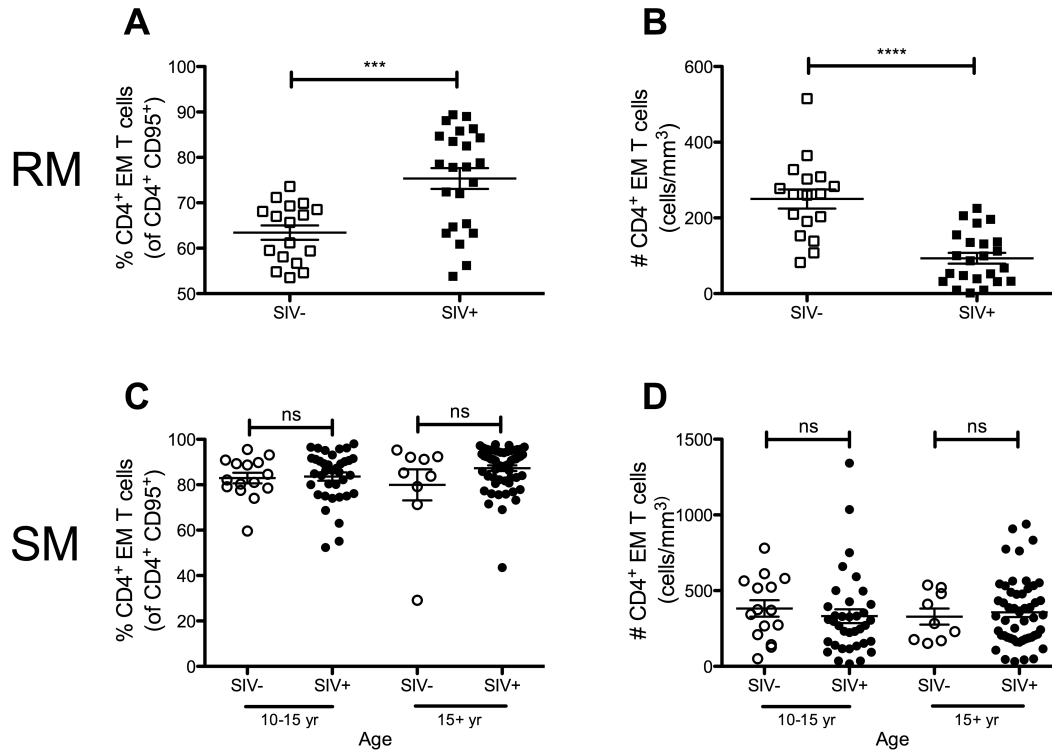

**SUPPLEMENTAL FIGURE 3. CD4<sup>+</sup> TEM cells are depleted as a result of pathogenic SIV infection in RMs, but are maintained in the natural SIV infection of SMs.** Frequencies (of CD4<sup>+</sup>CD95<sup>+</sup> cells; A) and cell counts (B) of CD4<sup>+</sup> TEM in whole blood were compared between uninfected (□) and SIV-infected (■) RMs (\*\*\*,  $P < 0.001$ ; \*\*\*\*,  $P < 0.0001$ ; as determined by  $t$  test). The percentages (C) of CD4<sup>+</sup> TEM cells (of CD4<sup>+</sup>CD95<sup>+</sup> cells) in whole blood were compared between age-matched uninfected (o) and SIV-infected (•) SMs. Numbers of CD4<sup>+</sup> TEM cells (cells/mm<sup>3</sup>) were measured in the same cohort of SMs (D) ( $P = ns$ ; as determined by the Mann-Whitney  $U$  test).

### Supplemental Figure 4

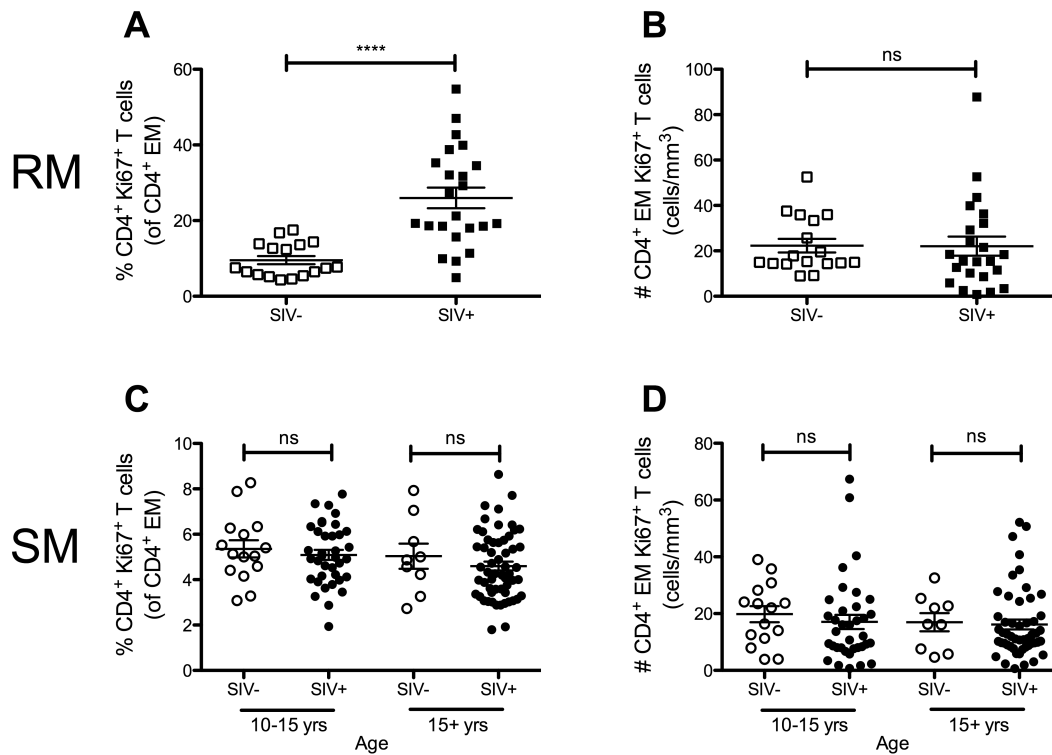

**SUPPLEMENTAL FIGURE 4. Pathogenic SIV infection of RMs results in increased levels of proliferating CD4<sup>+</sup> TEM cells, which is unseen in the natural SIV infection of SMs.** Comparison of the percentages (A) and numbers (B) of proliferating CD4<sup>+</sup> Ki67<sup>+</sup> TEM cells between uninfected (□) and SIV-infected (■) RMs. The levels of proliferating CD4<sup>+</sup> TEM cells were compared between age-matched uninfected (o) and SIV-infected SMs (•), by both frequencies (C) and cell counts (D) (\*\*\*\*,  $P < 0.0001$ ;  $P = ns$ ; as determined by Mann-Whitney  $U$  tests).
